# Supplementary material
Source: PubMed Central journal article supplement (PMC365715)

GO:0000107  
A imidazoleglycerol phosphate synthase activity

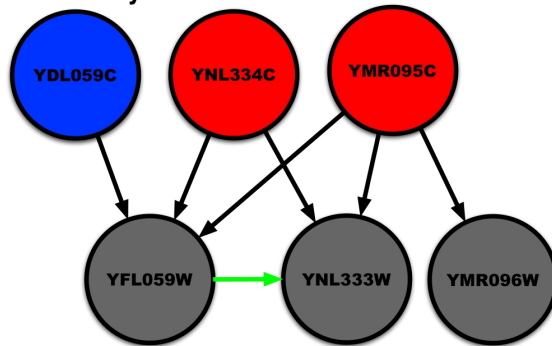

B GO:0015031 Protein Transport  
GO:0009306 Protein Secretion

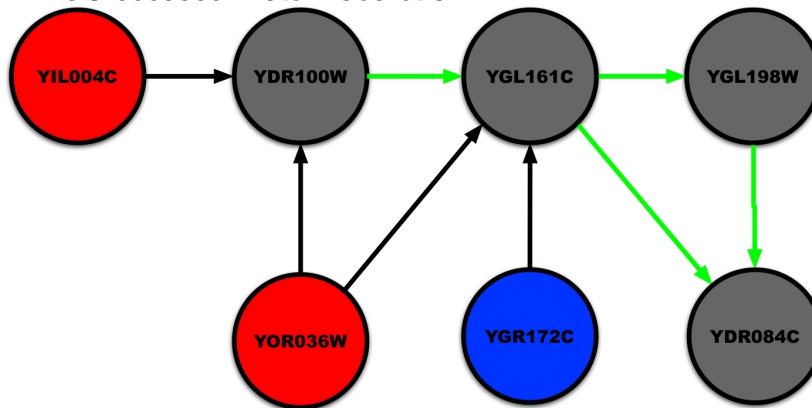

C GO:0006364  
rRNA processing

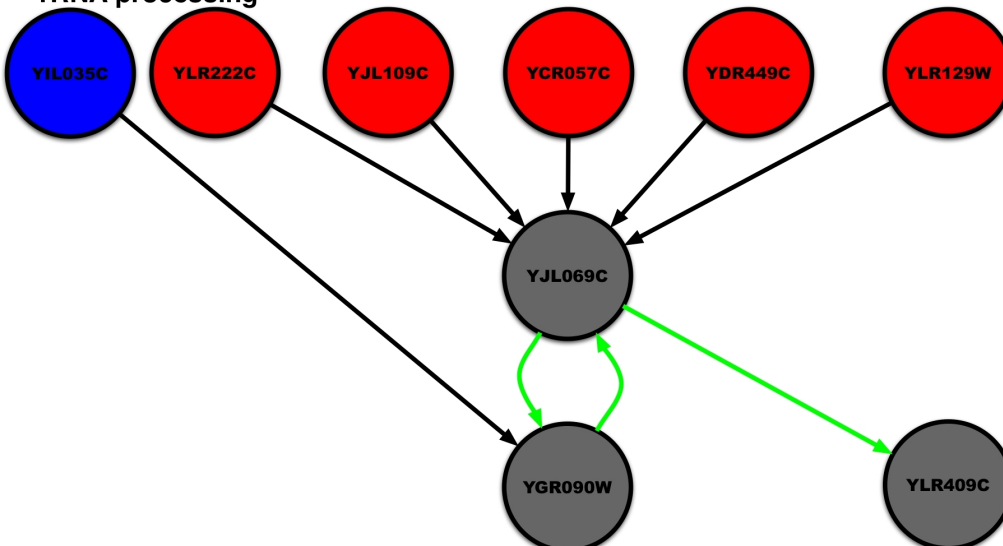

**D** GO:0019887  
Protein Kinase Regulator Activity

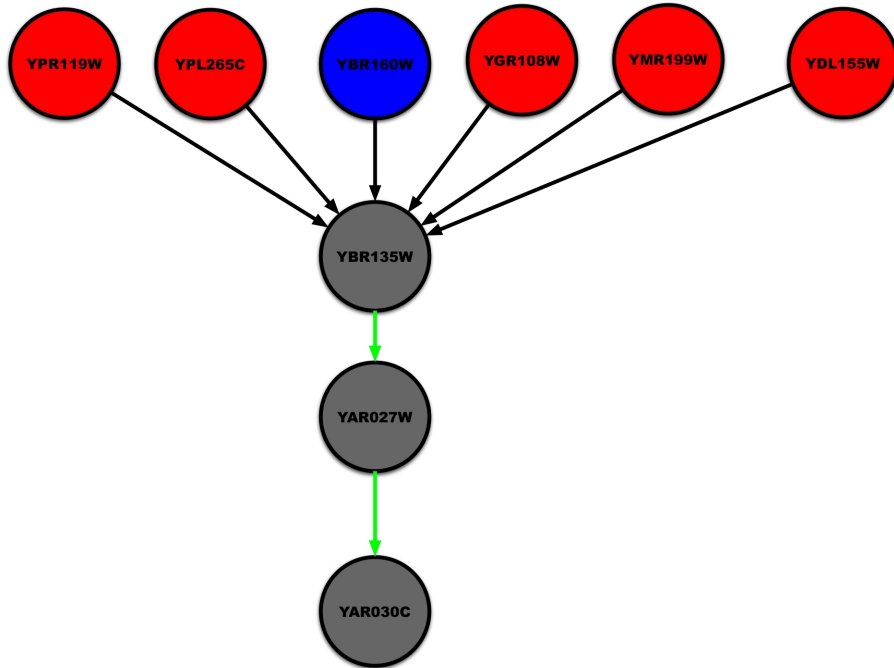

Supplement: pnas_101_9_2888__6.pdf [file pnas_101_9_2888__6.pdf]
