# Supplementary material
Source: PubMed Central journal article supplement (PMC365715)

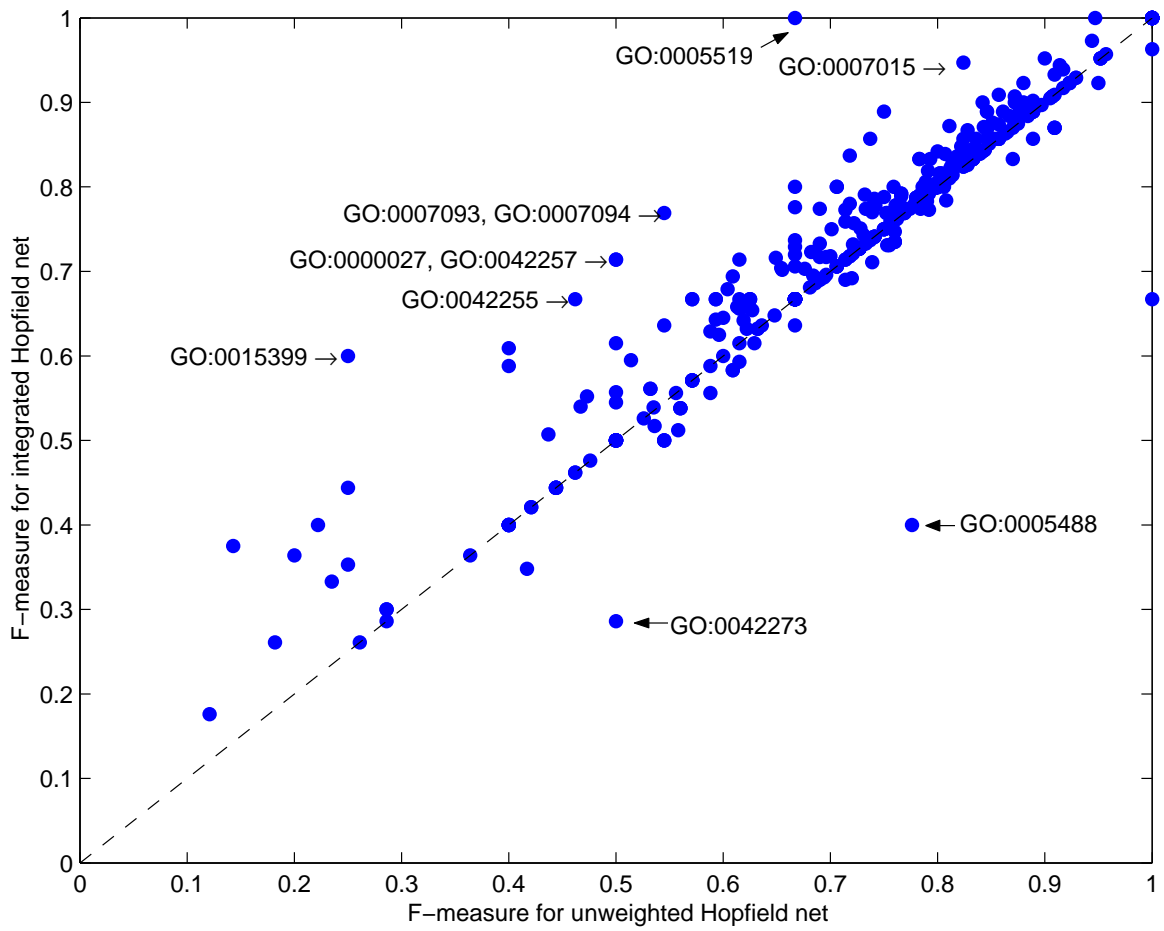

Supplement: pnas_101_9_2888__2.pdf [file pnas_101_9_2888__2.pdf]
